# Supplementary figures and images for: Quantitative Assessment of Tumor Contact with Neurogenic Zones and Its Effects on Survival: Insights beyond Traditional Predictors
Source: MDPI journal article supplement (doi:10.3390/cancers16091743), 2024-04-29

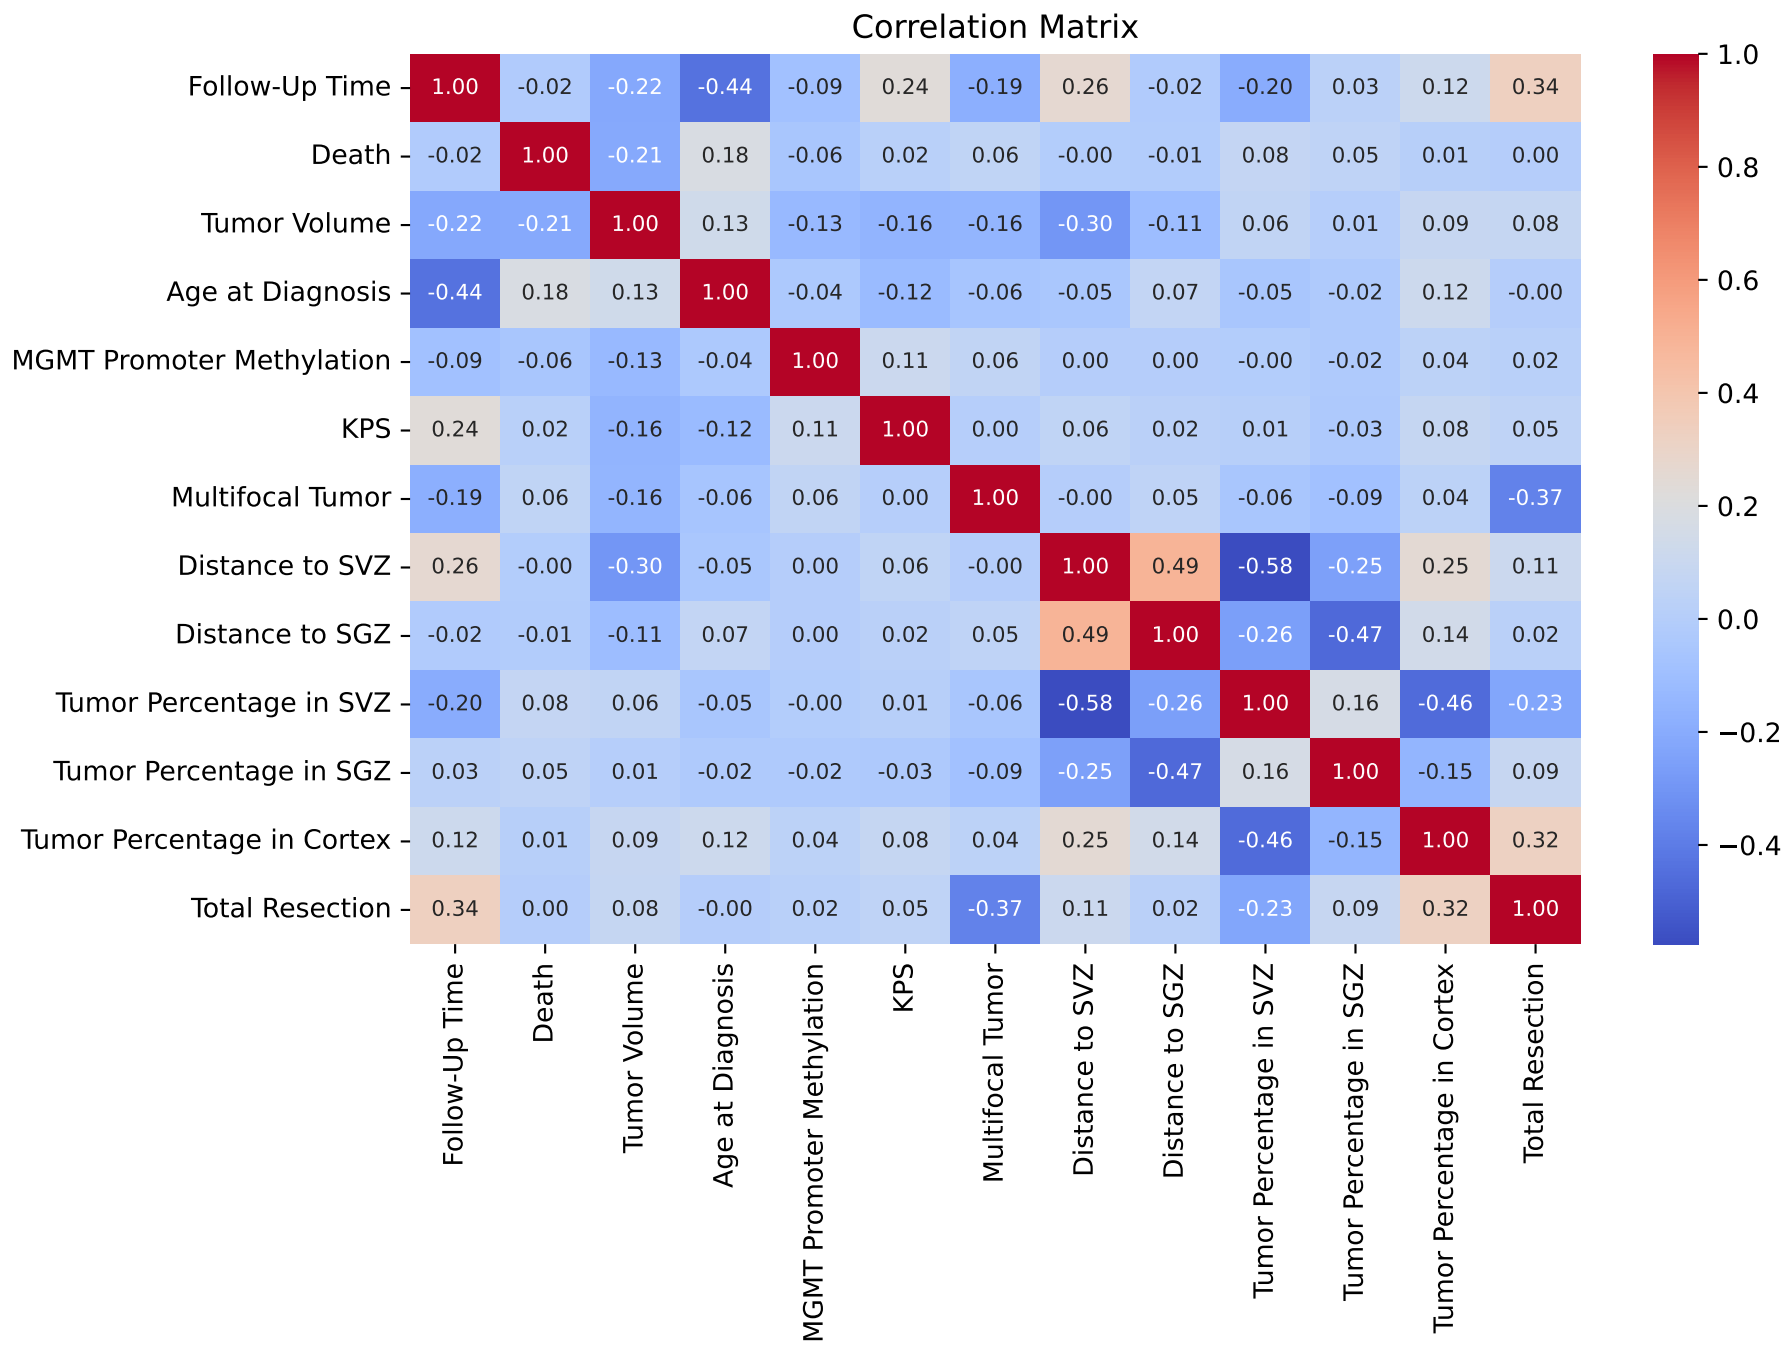

Supplement: s1 [file s1]
